# Supplementary material
Source: publisher site journal article supplement (https://www.dovepress.com/article/268146)
Supplement: Supplementary file 1 [file get_supplementary_file.php]

**Supplementary Table S1**: Primer sequences for RT-qPCR

| Gene name | Forward primer | Reverse primer |
| --- | --- | --- |
| LXRα | 5'-TCAGCATCTTCTCTGCAGACCGG-3' | TCATTAGCATCCGTGGGAACA-3' |
| SREBP1c | 5′-AGCCATGGATTGCACATTTG-3′ | 5′-GGTACATCTTTACAGCAGTG-3′ |
| PPARα | 5′-CATCGAGTGTCGAATATGTGG-3′ | 5′-GCAGTACTGGCATTTGTTCC-3′ |
| PERK | 5'-GCATTCTTCGCCATGTTGCT-3' | 5'-GGCATCATAGGCACCATATCCA-3' |
| IRE1α | 5′-TTTGACAACCGTGATGTGGC-3′ | 5′-TGGCAATGTACTGGAACTGC-3′ |
| β-actin | 5′-TACAATGAGCTGCGTGTGG-3′ | 5′-TGGTGGTGAAGCTGTAGCC-3′ |
